# Supplementary material
Source: MDPI journal article supplement (https://www.mdpi.com/2073-4433/7/3/34)
Supplement: s1 [file s1]

# Supplementary Material: Biophysical Impacts of Land Use Change over North America as Simulated by the Canadian Regional Climate Model. *Atmosphere* 2016, 7, 34.

Arlette Chacón, Laxmi Sushama and Hugo Beltrami

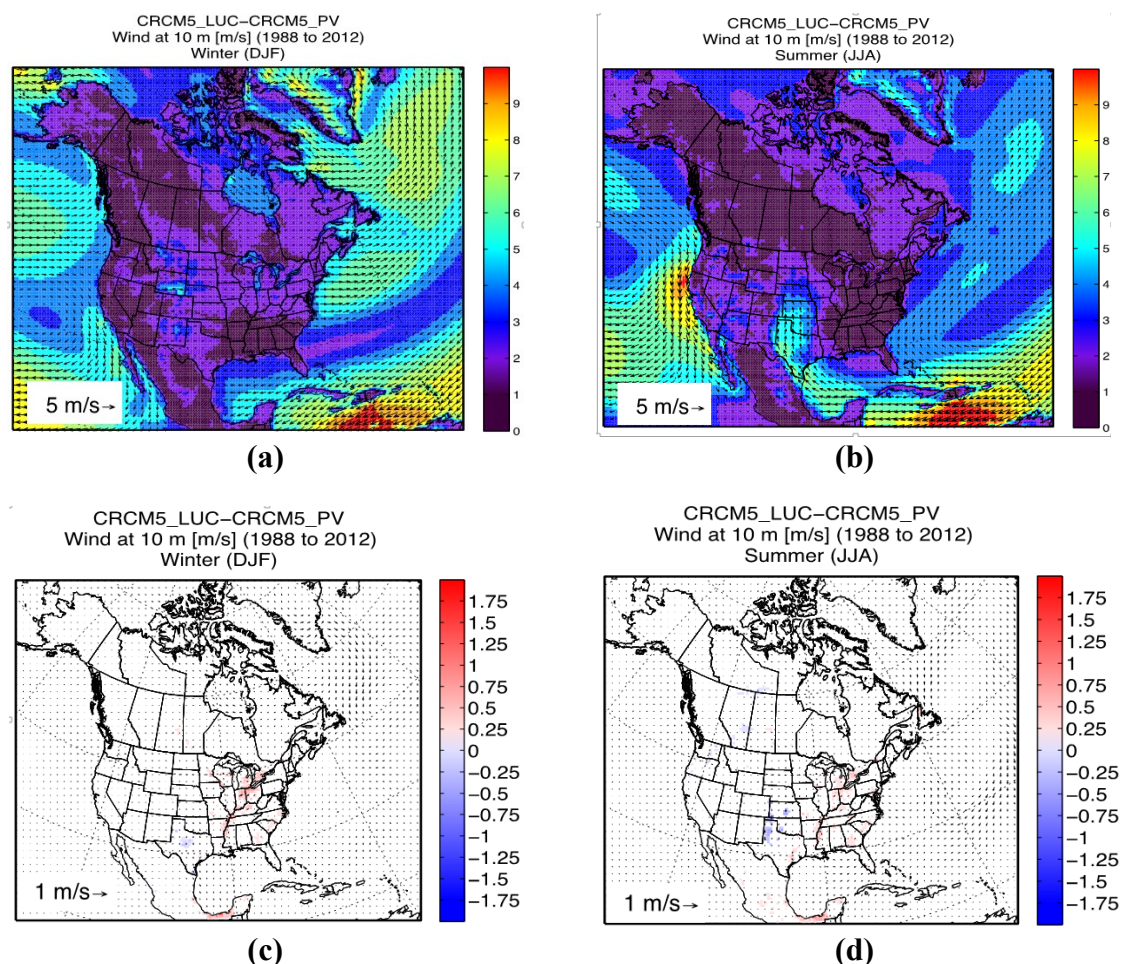

**Figure S1.** Seasonal average wind at 10 m for 1988–2012 period for (a) winter and (b) summer seasons. Differences between CRCM5\_LUC and CRCM5\_PV for 1988–2012 period for (c) winter and (d) summer seasons. Colour shading indicates grid points with statistically significant differences at 0.05 level.

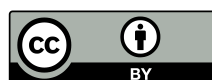

© 2016 by the authors; licensee MDPI, Basel, Switzerland. This article is an open access article distributed under the terms and conditions of the Creative Commons by Attribution (CC-BY) license (<http://creativecommons.org/licenses/by/4.0/>).
